# Supplementary material
Source: Elsevier journal article supplement (https://git.physik.uzh.ch/gitbucket/mchrzasz/Lecture_repo/raw/7b42a401c1c5f65106b09d269914f4da09ff6340/Lectures_others/MC/W_Placzek_2010/mmc07.pdf)
Supplement: mmc07 [file mmc07.pdf]

# Generatory liczb losowych dla podstawowych rozkładów prawdopodobieństwa

- **Rozkłady ciągłe.**
  - ▷ Rozkład wykładniczy.
  - ▷ Rozkład normalny (Gaussa).
  - ▷ Rozkład Cauchy'ego (Breita–Wignera).
  - ▷ Rozkład potęgowy.
  - ▷ Rozkłady  $\alpha$ -stabilne.
- **Rozkłady wielowymiarowe.**
  - ▷ Metody ogólne.
  - ▷ Rozkład równomierny na sferze i kuli w  $\mathbb{R}^m$ .
  - ▷ Rozkład równomierny na sympleksie i na powierzchni sympleksu.
- **Rozkłady dyskretne.**
  - ▷ Rozkład dwumianowy.
  - ▷ Rozkład Poissona.
  - ▷ Rozkład geometryczny.
  - ▷ Pewna metoda ogólna.

Rozkład wykładniczy  $E(\theta, \lambda)$ :

► Gęstość prawdopodobieństwa:

$$\rho_{\theta, \lambda}(x) = \frac{1}{\lambda} e^{-\frac{x-\theta}{\lambda}}, \quad x \geq \theta.$$

→ Transformacja liniowa:

$$x \rightarrow x' = \frac{x - \theta}{\lambda} \Rightarrow E(\theta, \lambda) \rightarrow E(0, 1): \rho_{0,1}(x') = e^{-x'}, \quad x' \geq 0.$$

**A. Metoda odwracania dystrybuanty:**

$$X' = -\ln R, \quad R \in \mathcal{U}(0, 1), \quad \Rightarrow \quad X = \lambda X' + \theta.$$

**B. Metoda serii monotonicznych (J. von Neumann, 1951) – rozkład  $E(0, 1)$ :**

1. Generujemy ciąg  $U_1, U_2, \dots \in \mathcal{U}(0, 1)$ .
2. Obserwujemy serie postaci:  $U_1 \geq U_2 \geq \dots \geq U_n < U_{n+1}$  i numerujemy je kolejnymi liczbami  $0, 1, 2, \dots$
3. Numer pierwszej serii, której długość  $n$  jest liczbą **nieparzystą** przyjmujemy za **część całkowitą** generowanej liczby losowej  $X$ , natomiast wartość  $R_1$  pierwszej liczby w tej serii – za jej **część ułamkową**.

⇒ **Ćw. N9.1:** Używając metody serii monotonicznych wygenerować rozkład  $E(0, 1)$ . Wykonać histogram i porównać z wykresami funkcji gęstości prawdopodobieństwa oraz dystrybuanty.

## Rozkład normalny (Gaussa) $N(\mu, \sigma)$ :

► Gęstość prawdopodobieństwa:

$$\phi_{\mu, \sigma}(x) = \frac{1}{\sigma\sqrt{2\pi}} e^{-\frac{(x-\mu)^2}{2\sigma^2}}, \quad -\infty < x < +\infty.$$

→ Zamiana zmiennych (transformacja liniowa):

$$x \rightarrow x' = (x - \mu)/\sigma \Rightarrow N(\mu, \sigma) \rightarrow N(0, 1): \phi_{0,1}(x') = (1/\sqrt{2\pi}) e^{-x'^2/2}.$$

**A. Metoda oparta o centralne twierdzenie graniczne** → patrz wykład 1.

▷ Dobra dla obszaru centralnego, zła dla „ogonów” rozkładu!

**B. Metoda odwracania dystrybuanty – w jednym wymiarze:**

▷ W jednym wymiarze dystrybuanta nie jest odwracalna analitycznie – czasem stosuje się pewne przybliżenia dla funkcji odwrotnej do dystrybuanty, np. (Odeh i Evans, 1974):

$$\Phi^{-1}(u) = \begin{cases} g(u), & 10^{-20} < u < 0.5, \\ -g(1-u), & 0.5 < u < 1 - 10^{-20}, \end{cases} \quad \left| \begin{array}{l} g(u) = t - \frac{L(t)}{M(t)}, \\ t = \sqrt{-2 \ln u}, \end{array} \right.$$

$$L(t) = 0.322232431088 + t + 0.342242088547t^2 + 0.0204231210245t^3 + 0.0000453642210148t^4,$$

$$M(t) = 0.099348462606 + 0.588581570495t + 0.531103462366t^2 + 0.10353775285t^3 + 0.0038560700634t^4.$$

**C. Metoda odwracania dystrybuanty – w dwóch wymiarach:**

▶ Gęstość prawdopodobieństwa:

$$\rho(x, y) = \frac{1}{2\pi} e^{-\frac{x^2+y^2}{2}}, \quad -\infty < x, y < +\infty.$$

▷ Przechodzimy do współrzędnych biegunowych:

$$(x, y) = (r \cos \phi, r \sin \phi), \quad 0 \leq \phi < 2\pi, \quad 0 \leq r < +\infty,$$

$$\Rightarrow \text{faktoryzacja: } \tilde{\rho}(\phi, r) = f(\phi) g(r), \quad \text{gdzie: } f(\phi) = \frac{1}{2\pi}, \quad g(r) = r e^{-\frac{r^2}{2}}.$$

→ Zmienną kątową generujemy z rozkładu równomiernego, a zmienną radialną przez odwrócenie dystrybuanty.

▷ Niech  $U_1, U_2 \in \mathcal{U}(0, 1)$ :

$$\left. \begin{aligned} x &= \sqrt{-2 \ln U_1} \cos(2\pi U_2) \\ y &= \sqrt{-2 \ln U_1} \sin(2\pi U_2) \end{aligned} \right\} \text{niezależne zmienne losowe o rozkładach } N(0, 1).$$

▶ Zalety: Dokładna i prosta w użyciu!

▶ Wada: Czasochłonne obliczanie funkcji logarytmicznych i trygonometrycznych!

**D. Metoda Marsaglii i Braya (1964):**

TWIERDZENIE:

Jeżeli:  $U_1, U_2 \in \mathcal{U}(-1, 1)$  – niezależne zmienne losowe,  
to przy warunku:  $U_1^2 + U_2^2 \leq 1$ , zmienne losowe:

$$X_1 = U_1 \sqrt{\frac{-2 \ln(U_1^2 + U_2^2)}{U_1^2 + U_2^2}}, \quad Y_1 = X_1 \frac{U_2}{U_1}$$

są niezależne i mają rozkład normalny  $N(0, 1)$ .

▷ Schemat:

1. Wygenerować:  $R_1, R_2 \in \mathcal{U}(0, 1)$  i wyliczyć:  $U_1 = 2R_1 - 1$ ,  $U_2 = 2R_2 - 1$ .
2. Wyliczyć:  $W = U_1^2 + U_2^2$ .
3. Jeżeli:  $W > 1$ , to wrócić do kroku 1. (→ eliminacja ok. 21% przypadków).
4. Wyznaczyć:  $X = U_1 Z$  oraz  $Y = U_2 Z$ , gdzie:  $Z = \sqrt{\frac{-2 \ln W}{W}}$ .

**E. Metoda eliminacji względem rozkładu wykładniczego** → patrz wykład 6.

**F. Metoda kombinacji superpozycji rozkładów i eliminacji** → patrz wykład 6.

⇒ **Ćw. N9.2:** Wygenerować rozkład normalny metodami odwracania dystrybuanty oraz Marsaglii i Braya.

**Rozkład Cauchy'ego (Breita–Wignera)  $C(\theta, \lambda)$ :**

► Gęstość prawdopodobieństwa:

$$f_{\theta, \lambda}(x) = \frac{\lambda}{\pi} \frac{1}{\lambda^2 + (x - \theta)^2}, \quad -\infty < x < +\infty.$$

→ Zamiana zmiennych (transformacja liniowa):

$$x \rightarrow x' = \frac{x - \theta}{\lambda} \Rightarrow C(\theta, \lambda) \rightarrow C(0, 1): \quad f_{0,1}(x') = \frac{1}{\pi} \frac{1}{1 + x'^2}.$$

▷ Uwaga: Wartość oczekiwana nie istnieje, a wariancja jest nieskończona!

**A. Metoda odwracania dystrybuanty:**

► Dystrybuanta:

$$F(x) = \frac{1}{\pi} \arctan x + \frac{1}{2}$$

$$\Rightarrow X = \operatorname{tg} \left( \pi \left[ U - \frac{1}{2} \right] \right), \quad U \in \mathcal{U}(0, 1)$$

## B. Z uciętego rozkładu Cauchy'ego (kombinacja metody superpozycji rozkładów i eliminacji):

► Ucięty rozkład Cauchy'ego  $C_u(0, 1)$ :

$$f_u(x) = \begin{cases} \frac{2}{\pi} \frac{1}{1+x^2}, & |x| \leq 1, \\ 0, & |x| > 1. \end{cases}$$

LEMAT:

Jeżeli zmienna losowa  $X$  ma ucięty rozkład Cauchy'ego  $C_u(0, 1)$ , to zmienna losowa  $Y$ , która z prawdopodobieństwem  $\frac{1}{2}$  jest identyczna ze zmienną losową  $X$  oraz z prawdopodobieństwem  $\frac{1}{2}$  jest identyczna ze zmienną losową  $1/X$ , ma rozkład Cauchy'ego  $C(0, 1)$ .

Dowód: Niech  $y \leq -1$ :

$$\begin{aligned} \mathcal{P}\{Y \leq y\} &= \frac{1}{2} \mathcal{P}\{X \leq y\} + \frac{1}{2} \mathcal{P}\left\{\frac{1}{X} \leq y\right\} = 0 + \frac{1}{2} \mathcal{P}\left\{\frac{1}{y} \leq X < 0\right\} = \frac{1}{2} \frac{2}{\pi} \int_{1/y}^0 \frac{dt}{1+t^2} \\ &= \frac{1}{\pi} \arctg y + \frac{1}{2} \quad \text{– dystrybuanta rozkładu Cauchy'ego } C(0, 1). \end{aligned}$$

Podobnie dowodzimy dla  $y \in (-1, 1)$  oraz  $y \geq 1$ .    ☒

► Ucięty rozkład Cauchy'ego generujemy np. metodą eliminacji względem rozkładu  $\mathcal{U}(-1, 1)$  lub metodą AC z:  $g(x) = 0.5$ ,  $f_1(x) = f_u(x) - f_u(0) + 0.5$ ,  $f_2(x) = f_u(0) - 0.5$ .

⇒ **Ćw. N9.3:** Wygenerować rozkład Cauchy'ego powyższymi metodami.

## Rozkład potęgowy:

► Gęstość prawdopodobieństwa:

$$f_1(x) = n x^{n-1},$$

$$f_2(x) = n (1 - x)^{n-1}$$

gdzie:  $0 \leq x \leq 1$ ,  $n \in \mathbb{N}$ .

**A. Metoda odwracania dystrybuanty:**

$$X = U^{1/n} \quad \rightarrow f_1, \quad U \in \mathcal{U}(0, 1).$$

$$Y = 1 - U^{1/n} \quad \rightarrow f_2, \quad U \in \mathcal{U}(0, 1).$$

▷ Wada: Czasochłonna operacja  $U^{1/n}$ .

**B. Niech  $U_1, U_2, \dots, U_n \in \mathcal{U}(0, 1)$  – niezależne zmienne losowe:**

$$X = \max\{U_1, U_2, \dots, U_n\} \text{ ma rozkład o gęstości } f_1,$$

$$Y = \min\{U_1, U_2, \dots, U_n\} \text{ ma rozkład o gęstości } f_2.$$

⇒ **Ćw. N9.4:** Wygenerować rozkład potęgowy powyższymi metodami dla kilku wartości  $n$ .



**Rozkłady  $\alpha$ -stabilne**  $S_\alpha(\sigma, \beta, \mu)$ :

Zmienna losowa  $X$  ma rozkład  $\alpha$ -stabilny,  $0 < \alpha \leq 2$ , z parametrem skali  $\sigma > 0$ , z parametrem asymetrii  $\beta \in [-1, 1]$  i z parametrem położenia  $\mu \in \mathbb{R}$ , jeżeli jej funkcja charakterystyczna  $\phi(t)$  jest dana wzorem:

$$\ln \phi(t) = \begin{cases} -\sigma^\alpha |t|^\alpha \left(1 - i\beta \operatorname{sign} t \operatorname{tg} \frac{\pi\alpha}{2}\right) + i\mu t, & \alpha \neq 1, \\ -\sigma |t| \left(1 - i\beta \operatorname{sign} t \frac{2}{\pi} \ln |t|\right) + i\mu t, & \alpha = 1. \end{cases}$$

- ▷ Dla  $\alpha = 2$  – rozkład normalny.
  - ▷ Dla  $\alpha = 1$  – rozkład Cauchy'ego.
  - ▶ W pozostałych przypadkach nie jest znany wzór analityczny dla gęstości prawdopodobieństwa lub dystrybuanty tego rozkładu!
  - ▷ Dla  $0 < \alpha < 2$  – rozkład Levy'ego, który ma zachowanie asymptotyczne w postaci tzw. ogonów Pareto:  $\sim \sigma^\alpha / |x|^{1+\alpha}$ .
- ¶ **Dygresja:** Rozkład jest stabilny jeżeli suma niezależnych zmiennych losowych z tego rozkładu jest też zmienną losową z tego rozkładu (choć z innymi parametrami).

Jeżeli zmienna losowa  $X$  ma rozkład  $S_\alpha(1, \beta, 0)$ , to zmienna losowa  $Y$  dana wzorem:

$$Y = \begin{cases} \sigma X + \mu & \alpha \neq 1, \\ \sigma X + \frac{2}{\pi} \beta \sigma \ln \sigma + \mu & \alpha = 1, \end{cases}$$

ma rozkład  $S_\alpha(\sigma, \beta, \mu)$ .

► Algorytm generowania zmiennej losowej  $X$  (Chambers, Mallows, Stuck, 1976):

1. Wygenerować zmienną losową:  $U \in \mathcal{U}(-\pi/2, \pi/2)$ .
2. Wygenerować zmienną losową  $W$  o rozkładzie wykładniczym  $E(0, 1)$ .

A) Dla  $\alpha = 1$  obliczyć:

$$X = \frac{2}{\pi} \left[ \left( \frac{\pi}{2} + \beta U \right) \operatorname{tg} U - \beta \ln \frac{\frac{\pi}{2} W \cos U}{\frac{\pi}{2} + \beta U} \right],$$

B) Dla  $\alpha \neq 1$  obliczyć:

$$X = S_{\alpha, \beta} \frac{\sin(\alpha[U + B_{\alpha, \beta}])}{(\cos U)^{1/\alpha}} \left\{ \frac{\cos(U - \alpha[U + B_{\alpha, \beta}])}{W} \right\}^{(1-\alpha)/\alpha},$$

gdzie:

$$B_{\alpha, \beta} = \alpha^{-1} \operatorname{arc} \operatorname{tg} \left( \beta \operatorname{tg} \frac{\pi \alpha}{2} \right), \quad S_{\alpha, \beta} = \left( 1 + \beta^2 \operatorname{tg}^2 \frac{\pi \alpha}{2} \right)^{1/(2\alpha)}.$$

**Rozkład dwumianowy (Bernoulliego)  $b(n, p)$ :**

► Gęstość prawdopodobieństwa:

$$\mathcal{P}\{X = m\} = \binom{n}{m} p^m (1 - p)^{n-m}, \quad m = 0, 1, 2, \dots, n.$$

→ Liczba sukcesów w schemacie Bernoulliego z prawdopodobieństwem sukcesu  $p$ .

► **Algorytm 1:** (typu „Igła Buffona”)

```
m = 0;
for (i = 0; i < n; i++) {
    U = GenU(0,1);           // tzn. U z rozkładu U(0,1)
    if (U <= p) m++;
}
return m;
```

▷ **Wada:** Wymaga wielu liczb losowych.

Jeżeli  $n$  nie jest bardzo duże, to może opłacać się stabilizowanie dystrybuanty, tzn. obliczenie:

$$p_k = \sum_{i=0}^k \mathcal{P}\{X = i\}$$

i skorzystanie z następującego algorytmu, który wymaga tylko jednej liczby losowej:

► **Algorytm 2:**

```
m = 0;  
U = GenU(0,1);           // tzn. U z rozkładu U(0,1)  
while (U > p[m]) m++;  
return m;
```

Jeżeli  $n$  jest duże, ale może być przedstawione w postaci  $n = kl$ , gdzie  $l$  nie jest bardzo duże, to może opłacać się generowanie  $k$  liczb losowych o rozkładach dwumianowych  $b(l, p)$  za pomocą powyższego algorytmu i obliczenie  $m$  jako sumy tak wygenerowanych liczb.

LEMAT:

Jeżeli zmienna losowa  $U \in \mathcal{U}(0, 1)$ , to zmienne losowe:

$$Y = \Theta(p - U) \quad \text{oraz} \quad V = \min \left\{ \frac{U}{p}, \frac{1 - U}{1 - p} \right\}$$

są niezależne i  $V \in \mathcal{U}(0, 1)$ .

Dowód: np. [Wieczorkowski i Zieliński \(1997\)](#).

▷ Zmienną losową  $Y$  możemy traktować jako wskaźnik pojawienia się sukcesu, a zmienną losową  $V$  jako zmienną losową o rozkładzie  $\mathcal{U}(0, 1)$  w niezależnym powtórzeniu doświadczenia w schemacie Bernoulliego.

► **Algorytm 3:** (potrzebna tylko jedna liczba losowa!)

```

m = 0;
U = GenU(0,1);           // tzn. U z rozkładu U(0,1)
for (i = 0; i < n; i++)
    if (U <= p) { m++; U /= p; }
    else U = (1 - U)/(1 - p);
return m;

```

⇒ **Ćw. N9.5:** Zaimplementować generatory rozkładu dwumianowego według powyższych algorytmów.

Rozkład Poissona  $P(\lambda)$ :

► Gęstość prawdopodobieństwa:

$$\mathcal{P}\{X = n\} = \frac{\lambda^n}{n!} e^{-\lambda}, \quad n = 0, 1, 2, \dots$$

A) LEMAT:

Jeżeli  $\xi_0, \xi_1, \xi_2, \dots$  – niezależne zmienne losowe o rozkładzie wykładniczym  $E(0, 1)$ , to zmienna losowa:

$$X = \min \left\{ k : \sum_{i=0}^k \xi_i > \lambda \right\}$$

ma rozkład Poissona  $P(\lambda)$ .

Dowód: Zdarzenia losowe:  $\{X \leq k\}$  oraz  $\{\sum_{i=0}^k \xi_i > \lambda\}$  są równoważne.

Zmienna losowa  $\sum_{i=0}^k \xi_i$  ma rozkład  $\Gamma(k+1, 1)$ , gdzie  $\Gamma(\alpha, \theta)$  – rozkład gamma o gęstości:

$$f_{\alpha, \theta}(x) = \frac{1}{\Gamma(\alpha) \theta^\alpha} x^{\alpha-1} e^{-x/\theta}.$$

Zatem  $\mathcal{P}\{X \leq k\} = \int_{\lambda}^{+\infty} f_{k+1, 1}(x) dx$  i wystarczy pokazać, że

$\mathcal{P}\{X = k\} = \mathcal{P}\{X \leq k\} - \mathcal{P}\{X \leq k-1\}$  jest równe prawdopodobieństwu Poissona.  $\square$

▶ **Algorytm 1:**

```
X = -1; S = 0;
while (S <= lambda) {
    Y = GenE(0,1);           // tzn. Y z rozkładu E(0,1)
    S += Y; X++;
}
return X;
```

→ **Oczywista odmiana tego algorytmu:**

▶ **Algorytm 2:**

```
X = -1; S = 1; q = exp(-lambda);
while (S > q) {
    U = GenU(0,1);         // tzn. U z rozkładu U(0,1)
    S *= U; X++;
}
return X;
```

▷ **Wada: Wymagają wielu liczb losowych.**

**B) Metoda odwracania dystrybuanty (ogólna):****► Algorytm 3:**

```
X = 0;
q = exp(-lambda);
S = P = q;
U = GenU(0,1);           // tzn. U z rozkładu U(0,1)
while (U > S) {
    X++;
    P *= lambda/X;
    S += P;
}
return X;
```

▷ **Wada:** Dla dużych wartości  $\lambda$  kumulacja błędów zaokrążeń przy obliczaniu prawdopodobieństw  $P$  może prowadzić do niedokładności numerycznych.

⇒ **Ćw. N9.6:** Zaimplementować generatory rozkładu Poissona według powyższych algorytmów i wygenerować rozkłady dla kilku wartości  $\lambda$ .



Rozkład geometryczny  $G(p)$ :

## ► Gęstość prawdopodobieństwa:

$$\mathcal{P}\{X = n\} = (1 - p) p^n, \quad n = 0, 1, 2, \dots$$

## LEMAT:

Jeżeli zmienna losowa  $X$  ma rozkład wykładniczy o gęstości:

$$f_\alpha(x) = \alpha e^{-\alpha x},$$

to zmienna losowa  $\lfloor X \rfloor$  (tzn. część całkowita  $X$ ) ma rozkład geometryczny:

$$G(e^{-\alpha}).$$

## ► Algorytm:

1. Generujemy zmienną losową:  $U \in \mathcal{U}(0, 1)$ .
2. Obliczamy:  $X = \lfloor \ln U / \ln p \rfloor$ .

⇒ Ćw. N9.7: Zaimplementować generator rozkładu geometrycznego i wygenerować rozkłady dla kilku wartości  $p$ .

## Metoda równomiernego rozbicia przedziału $(0, 1)$ :

### ► Ogólny rozkład dyskretny:

$$\mathcal{P}\{X = k\} = p_k, \quad k = 0, 1, \dots, K.$$

▷ Czasami metoda odwracania dystrybuanty (patrz wykład 6) może być bardzo wolna (duża wartość  $K$ )!

### ► Bardziej wydajna metoda:

- Przedział  $(0, 1)$  dzielimy na  $K + 1$  podprzedziałów (binów)  $\left(\frac{i-1}{K+1}, \frac{i}{K+1}\right)$  o jednakowej długości i numerujemy je kolejnymi liczbami  $1, 2, \dots, K + 1$ .  
→ Zmienna  $U \in \mathcal{U}(0, 1)$  wpada do binu o numerze  $\lfloor (K + 1)U + 1 \rfloor$ .
- Tworzymy ciąg:  $q_j = \sum_{k=0}^j p_k, \quad j = 0, 1, \dots, K$ .
- Tworzymy pomocniczy ciąg liczb:  $g_i = \max \left\{ j : q_j < \frac{i}{K+1} \right\}, \quad i = 1, 2, \dots, K + 1$ .

### ► Algorytm:

```
U = GenU(0, 1); // tzn. U z rozkładu U(0, 1)
X = g[(int) (K + 1)U + 1] + 1;
while (q[X-1] > U) X--; // oczekiwana liczba porównan <= 2
return X;
```

## Metody ogólne:

Niech  $\vec{X}$  –  $m$ -wymiarowa zmienna losowa o gęstości prawdopodobieństwa  $f(x_1, x_2, \dots, x_m)$ .

► Do generowania gęstości wielowymiarowej zmiennej losowej można stosować metody eliminacji oraz superpozycji rozkładów.

▷ Mogą się pojawić większe trudności techniczne, np. problem obszaru zmiennej losowej  $\vec{X}$ !

PRZYKŁAD:

Generowanie rozkładu równomiernego w kuli jednostkowej  $K_m(0, 1)$  metodą eliminacji względem rozkładu równomiernego na kostce  $[-1, 1]^m$ .

→ Prawdopodobieństwo akceptacji:  $p_m = \pi^{m/2} / [2^m \Gamma(m/2 + 1)]$ .

| $m$ | $p_m$                  | $N_m = 1/p_m$         |
|-----|------------------------|-----------------------|
| 2   | $7.854 \cdot 10^{-1}$  | 1.27                  |
| 5   | $1.645 \cdot 10^{-1}$  | 6.08                  |
| 10  | $2.490 \cdot 10^{-3}$  | $4.015 \cdot 10^2$    |
| 20  | $2.461 \cdot 10^{-8}$  | $4.063 \cdot 10^7$    |
| 50  | $1.537 \cdot 10^{-28}$ | $6.507 \cdot 10^{28}$ |

## Metody ogólne – c.d.

- Metoda eliminacji względem rozkładu równomiernego na wielowymiarowym hiperprostokącie  $\prod_{j=1}^m [a_j, b_j]$  jest najbardziej ogólną metodą generowania rozkładu równomiernego na dowolnym obszarze:  $\Omega \subset \mathbb{R}^m$ .
- Niektóre obszary  $\Omega$  można otrzymać przez nieosobliwe liniowe przekształcenie prostszych obszarów:
  - ▷ kula  $K_m(0, 1) \rightarrow$  elipsoidy w  $\mathbb{R}^m$ ;
  - ▷ sfera  $S_m(0, 1) \rightarrow$  powierzchnia elipsoidy w  $\mathbb{R}^m$ ;
  - ▷ sympleks  $\rightarrow$  niektóre wielościany wypukłe;
  - ▷ powierzchnia sympleksu  $\rightarrow$  powierzchnie takich wielościanów.
 Jeżeli  $\vec{X} \in \mathcal{U}(\Omega)$  oraz  $F$  – nieosobliwe przekształcenie liniowe  $\mathbb{R}^m$ , to  $F(\vec{X}) \in U(F(\Omega))$ .
- Gęstość wielowymiarowego rozkładu możemy przedstawić w postaci iloczynu gęstości rozkładów brzegowych i warunkowych:
 
$$f(x_1, \dots, x_m) = f(x_1)f(x_2|x_1)f(x_3|x_1, x_2) \dots f(x_n|x_1, x_2, \dots, x_{n-1}).$$
 $\rightarrow$  Zmienną losową  $\vec{X} = (X_1, \dots, X_m)$  generujemy „współrzędna po współrzędnej”, tzn.  $X_i$  wg. rozkładu  $f(x_i|x_1, x_2, \dots, x_{i-1})$  po wygenerowaniu:  $X_1, \dots, X_{i-1}$ .

- **Rozkład równomierny na sferze**  $S_m(0, 1)$ :

$$S_m(0, 1) = \left\{ (x_1, \dots, x_m) : \sum_{j=1}^m x_j^2 = 1 \right\}.$$

► **Algorytm:**

- 1) Generuj zmienne losowe  $Z_1, \dots, Z_m$  o rozkładzie normalnym  $N(0, 1)$ .
- 2) Oblicz:  $X_j = Z_j / \sqrt{\sum_{i=1}^m Z_i^2}$ ,  $j = 1, 2, \dots, m$ .
- 3) Return  $X = (X_1, \dots, X_m)$ .

- **Rozkład równomierny na kuli**  $K_m(0, 1)$ :

$$K_m(0, 1) = \left\{ (y_1, \dots, y_m) : \sum_{j=1}^m y_j^2 \leq 1 \right\}.$$

Jeżeli zmienna losowa  $Y$  ma rozkład równomierny na kuli  $K_m(0, 1)$ , to długość promienia wodzącego punktu  $Y$  jest zmienną losową o rozkładzie potęgowym z gęstością:

$$h(r) = mr^{m-1}, \quad 0 \leq r \leq 1.$$

► **Algorytm:**

- 1) Generuj zmienną losową  $X$  o rozkładzie równomiernym na sferze  $S_m(0, 1)$ .
- 2) Generuj  $R$  według rozkładu o dystrybuancie  $H(r) = r^m$ ,  $0 \leq r \leq 1$ .
- 3) Return  $Y = (RX_1, \dots, RX_m)$ .

- **Rozkład równomierny na sympleksie**  $W_m \rightarrow$  LEMAT:

Jeżeli  $U_1, \dots, U_m \in \mathcal{U}(0, 1)$  oraz  $U_{1:m}, \dots, U_{m:m}$  jest ciągiem odpowiednich statystyk pozycyjnych, to zmienna losowa  $\vec{X} = (X_1, \dots, X_m)$  dana wzorami:

$$X_1 = U_{1:m}, \quad X_2 = U_{2:m} - U_{1:m}, \quad \dots, \quad X_m = U_{m:m} - U_{m-1:m}$$

ma rozkład równomierny na sympleksie:

$$W_m = \left\{ (x_1, \dots, x_m) : \sum_{j=1}^m x_j \leq 1, \quad x_j \geq 0, \quad j = 1, 2, \dots, m \right\}.$$

- **Rozkład równomierny na powierzchni sympleksu**  $V_m \rightarrow$  LEMAT:

Jeżeli  $U_1, \dots, U_{m-1} \in \mathcal{U}(0, 1)$  oraz  $U_{1:m-1}, \dots, U_{m-1:m-1}$  jest ciągiem odpowiednich statystyk pozycyjnych, to zmienna losowa  $\vec{X} = (X_1, \dots, X_m)$  dana wzorami:

$$X_1 = U_{1:m-1}, \quad \dots, \quad X_{m-1} = U_{m-1:m-1} - U_{m-2:m-1}, \quad X_m = 1 - U_{m-1:m-1}$$

ma rozkład równomierny na powierzchni sympleksu:

$$V_m = \left\{ (x_1, \dots, x_m) : \sum_{j=1}^m x_j = 1, \quad x_j \geq 0, \quad j = 1, 2, \dots, m \right\}.$$

$\Rightarrow$  **Ćw. N9.8:** Zaimplementować generatory dla rozkładów na sferze, kuli, sympleksie i jego powierzchni.
